# Supplementary material for: Rapid diagnosis of acute myocardial infarction based on reverse transcription-accelerated strand exchange amplification of miR-208a
Source: Royal Society of Chemistry journal article supplement (doi:10.1039/d3ay01116j), 2023-01-01
Supplement: d3ay01116j1.pdf [file d3ay01116j1.pdf]

## Supplementary Materials

### Rapid diagnosis of acute myocardial infarction based on accelerated strand exchange amplification of miR-208a

Ying Zhao, <sup>#a</sup> Linlin Zhuang, <sup>#a</sup> Peilong Tian, <sup>a</sup> Ming Ma, <sup>\*a</sup> Guoqiu Wu, <sup>\*b</sup> and Yu Zhang <sup>\*a</sup>

<sup>a</sup> State Key Laboratory of Digital Medical Engineering, Jiangsu Key Laboratory for Biomaterials and Devices, School of Biological Science and Medical Engineering & Collaborative Innovation Center of Suzhou Nano Science and Technology, Southeast University, Nanjing 210096, P. R. China

<sup>b</sup> Center of Clinical Laboratory Medicine, Zhongda Hospital, Southeast University, Nanjing 210009, P. R. China

<sup>#</sup> These authors contributed equally to this work

<sup>\*</sup> These authors are the corresponding authors. E-mail addresses: zhangyu@seu.edu.cn, nationball@163.com, maming@seu.edu.cn.

Table S1 Confusion Matrix

| Confusion Matrix |        | cTnI                   |                        |
|------------------|--------|------------------------|------------------------|
|                  |        | AMI                    | Health                 |
| miR-208a         | AMI    | True Positive<br>(TP)  | False Positive<br>(FP) |
|                  | Health | False Negative<br>(FN) | True Negative<br>(TN)  |

#### Equations:

$$TPR (\text{True Positive Rate}) = \frac{TP}{TP + FN} \quad (1)$$

$$TNR (\text{True Negative Rate}) = \frac{TN}{TN + FP} \quad (2)$$

$$FPR (\text{False Positive Rate}) = \frac{FP}{FP + TN} = 1 - TNR \quad (3)$$

$$\text{Sensitivity} = \text{True Positive Rate} \quad (4)$$

$$\text{Specificity} = \text{True Negative Rate} \quad (5)$$

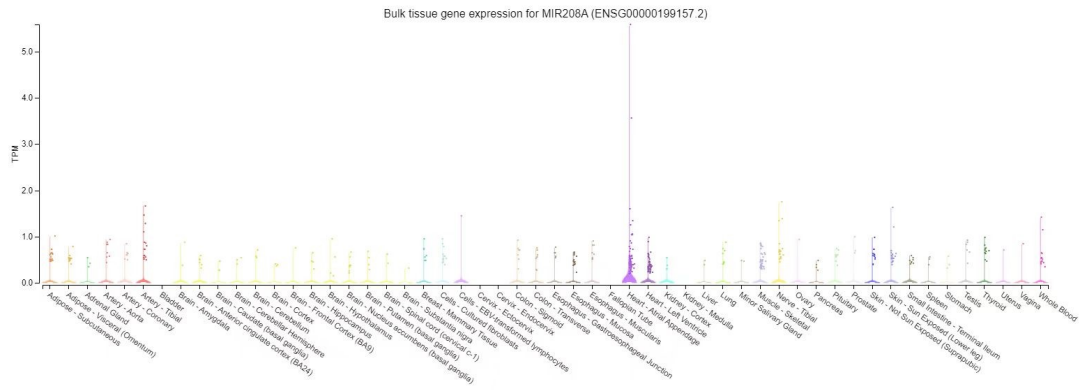

**Fig. S1** Specific expression of miR-208a in various diseases from GTEx website.

(<https://www.gtexportal.org/home/>)

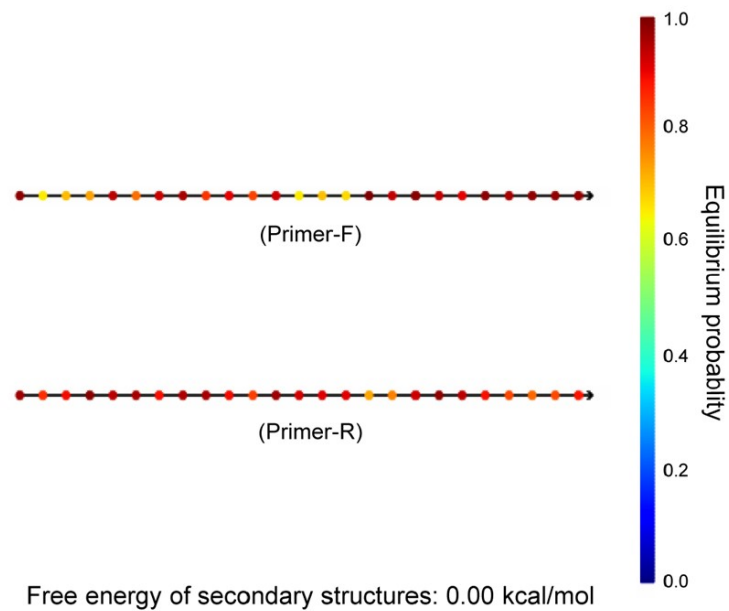

**Fig. S2** Analysis results of primers by NUPACK software. (<https://nupack.org/>)
